# Supplementary material for: β-arrestin2 alleviates L-dopa–induced dyskinesia via lower D1R activity in Parkinson’s rats
Source: publisher site journal article supplement (doi:10.18632/aging.102574), 2019-12-18
Supplement: Supplementary file [file aging-v11i24-102574-supplementary-material-SD1.pdf]

SUPPLEMENTARY FIGURES

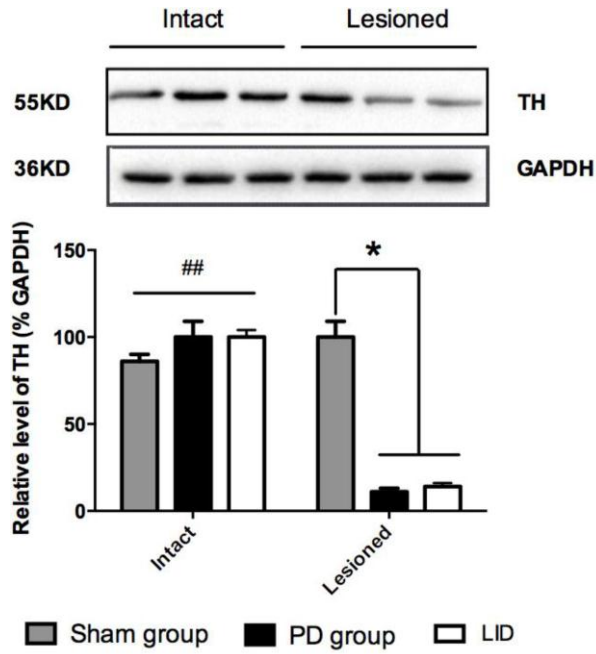

Supplementary Figure 1. Tyrosine hydroxylase (TH) protein levels in the Sham, PD and LID rats by western blot (n=4).

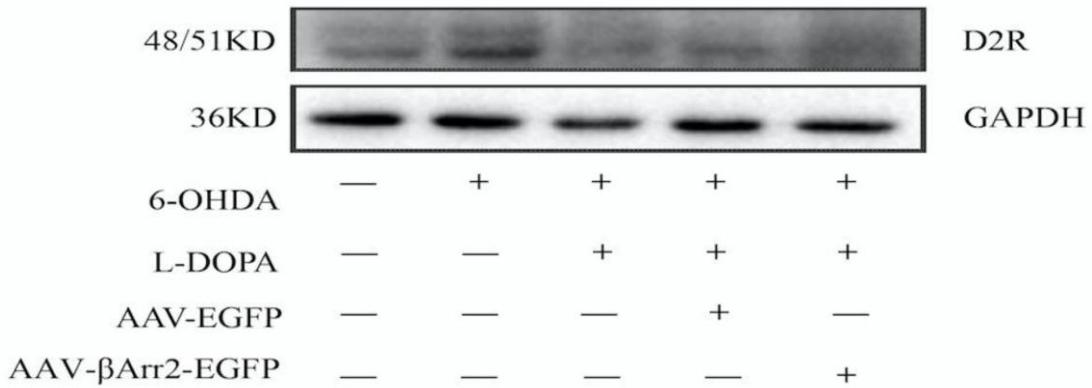

Supplementary Figure 2. D2R protein levels relative to GAPDH in each group by western blot (n=4).
